# Supplementary material for: Interdisciplinary Class Observation in Higher Education: Lessons Learned from the Professional Development Experience of Four Teachers
Source: MDPI journal article supplement (doi:10.3390/educsci11110706), 2021-11-03
Supplement: s1 [file s1]

Archive with 1 entries (1 files):
- education-1380903-supplementary.pdf
